# Supplementary material
Source: HighWire-hosted journal article supplement (https://www.annfammed.org/highwire/filestream/8335/field_highwire_adjunct_files/1/Magill_Supp_App_2.pdf)
Supplement: Magill_Supp_App_2.pdf [file Magill_Supp_App_2.pdf]

**Online Supplementary Material**

Day J, Scammon DL, Kim J, et al. Quality, satisfaction, and financial efficiency associated with elements of primary care practice transformation: preliminary findings. *Ann Fam Med*. 2013;11(Suppl 1):S50-S59.

[http://www.annfammed.org/content/11/Suppl\\_1/S50](http://www.annfammed.org/content/11/Suppl_1/S50).

---

**Supplemental Appendix 2.** CBD Implementation Assessment Tool

- A. Scoring
- B. Data Collection Instruments

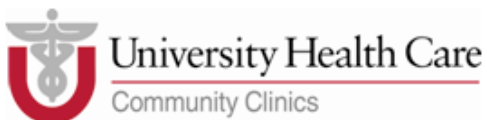

**Care by Design™ 2.0 - Status of Implementation CBD 4  
Score Sheet - revised 7/13/11**

| <b>Provider:</b>                                                                                                       | <b>Center:</b>                                   | <b>Team:</b>                                       | <b>Auditor:</b>                                    | <b>Date:</b>                                       | <b>Time:</b>                                     | <b>Results</b>                | <b>Score</b> |
|------------------------------------------------------------------------------------------------------------------------|--------------------------------------------------|----------------------------------------------------|----------------------------------------------------|----------------------------------------------------|--------------------------------------------------|-------------------------------|--------------|
| <b>Appropriate Access (AA)</b>                                                                                         | <b>Level 0</b>                                   | <b>Level 1</b>                                     | <b>Level 2</b>                                     | <b>Level 3</b>                                     | <b>Level 4</b>                                   |                               |              |
| <b>AA1:</b> Same-day appointments - Percent of appointments scheduled and seen same day (Appointment Lag)              | 0%-9% of appointments are scheduled for same day | 10%-19% of appointments are scheduled for same day | 20%-29% of appointments are scheduled for same day | 30%-39% of appointments are scheduled for same day | ≥40% of appointments are scheduled for same day. |                               |              |
| <b>AA2:</b> To the provider for continuity of care                                                                     | 0%-49%                                           | 50%-59%                                            | 60%-69%                                            | 70%-79%                                            | ≥80%                                             |                               |              |
| <b>AA4:</b> Attention to call center messages (In basket messages generated by call center to first contact < 3 hours) | 0%-49%                                           | 50%-62%                                            | 63%-75%                                            | 76%-89%                                            | ≥90%                                             |                               |              |
| <b>AA5a:</b> Getting through to the office by phone for an appointment                                                 | ≥5% dropped calls                                | 4.0%-4.9% dropped calls                            | 3.0%-3.9% dropped calls                            | 2.0%-2.9% dropped calls                            | ≤1.9% dropped calls                              |                               |              |
| <b>AA5b:</b> Getting through to the office by phone for an appointment                                                 | < 75% TSF                                        | 75%-84% TSF                                        | 85%-89% TSF                                        | 90%-94% TSF                                        | ≥95% TSF                                         |                               |              |
| <b>AA9:</b> Percent of patients signed up for MyChart (electronic access to health information)                        | < 10%                                            | 10%-14%                                            | 15%-19%                                            | 20%-24%                                            | ≥25%                                             |                               |              |
|                                                                                                                        |                                                  |                                                    |                                                    |                                                    |                                                  | <b>Subtotal (AA Average):</b> |              |

**Supplemental Appendix 2. CBD Implementation Assessment Tool, *continued***

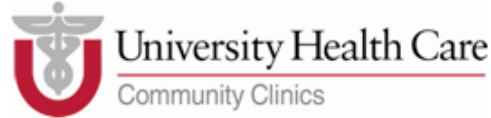

| Care Team (CT)                                                                                         | Level 0                                                                                 | Level 1                                                                                                | Level 2                                                                                            | Level 3                                                   | Level 4                                          | Results | Score |
|--------------------------------------------------------------------------------------------------------|-----------------------------------------------------------------------------------------|--------------------------------------------------------------------------------------------------------|----------------------------------------------------------------------------------------------------|-----------------------------------------------------------|--------------------------------------------------|---------|-------|
| <b>CT1a:</b> Standardized documentation: X-Files                                                       | Uses X-files < 50% of the time                                                          | 50%-62%                                                                                                | 63%-75%                                                                                            | 76%-89%                                                   | Uses X-Files ≥90% of the time                    |         |       |
| <b>CT1b:</b> Standardized documentation: physical template                                             | Uses standard physical template < 50% of the time                                       | 50%-62%                                                                                                | 63%-75%                                                                                            | 76%-89%                                                   | Uses standard physical template ≥90% of the time |         |       |
| <b>CT1c:</b> Standardized documentation — Best Practice Alerts                                         | Takes action on BPAs < 50% of the time                                                  | 50%-62%                                                                                                | 63%-75%                                                                                            | 76%-89%                                                   | Takes action on BPAs ≥90% of the time            |         |       |
| <b>CT4:</b> Standardized stocking for examination rooms                                                | No plan for stocking exam rooms and < 50% of rooms stocked consistently with each other | Plan, but < 50% of rooms stocked consistently OR No plan and < 75% of rooms consistent with each other | Plan, but < 75% of rooms stocked consistently OR No plan and ≥75% rooms consistent with each other | Plan, but < 90% of rooms stocked and cleaned consistently | Plan, and ≥90% exam rooms stocked consistently   |         |       |
| <b>CT7a:</b> Throughput: efficient check-in (patient waits ≤5 minutes from entering clinic to rooming) | < 20% of visits                                                                         | 20%-39%                                                                                                | 40%-59%                                                                                            | 60%-79%                                                   | ≥80%                                             |         |       |
| <b>CT7b:</b> Throughput: efficient visit (patient waits ≤10 minutes during visit)                      | < 20% of visits                                                                         | 20%-39%                                                                                                | 40%-59%                                                                                            | 60%-79%                                                   | ≥80%                                             |         |       |

**Supplemental Appendix 2. CBD Implementation Assessment Tool, *continued***

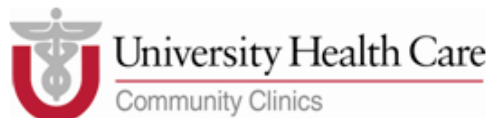

| Care Team (CT)                                                                                                                                                                       | Level 0                              | Level 1                                      | Level 2                                               | Level 3                                                                                                | Level 4                                                                                       | Results | Score |
|--------------------------------------------------------------------------------------------------------------------------------------------------------------------------------------|--------------------------------------|----------------------------------------------|-------------------------------------------------------|--------------------------------------------------------------------------------------------------------|-----------------------------------------------------------------------------------------------|---------|-------|
| <b>CT9:</b> Huddles and schedule reviews (most days = 3-4 days; most providers & MAs = no more than 1 of each missing)                                                               | No daily huddles or schedule reviews | Schedule review most days for most providers | Huddles most days with most MAs and providers present | Schedule review most days for most providers AND huddles most days with most providers and MAs present | Daily schedule reviews for all providers and daily huddles with all providers and MAs present |         |       |
| <b>CT10:</b> Referrals made at time of appointment, or detailed instructions with phone number in AVS                                                                                | < 50% of referred patients           | 50%-69%                                      | 70%-89%                                               | 90%-99%                                                                                                | 100%                                                                                          |         |       |
| <b>CT11:</b> Lab draws done in room                                                                                                                                                  | Labs drawn at lab or mini-lab        |                                              |                                                       |                                                                                                        | Labs drawn in room                                                                            |         |       |
| <b>CT12:</b> Continuity of MA with patient throughout the visit                                                                                                                      | < 50% of visits                      | 50%-69%                                      | 70%-89%                                               | 90%-99%                                                                                                | 100%                                                                                          |         |       |
| <b>CT13:</b> MA engagement in the visit (required elements: uses X-files, addresses BPAs, documents physical exam, places orders, gives AVS to patient, makes follow up appointment) | None                                 | 1-2 elements                                 | 3-4 elements                                          | 5 elements                                                                                             | 6 elements                                                                                    |         |       |

**Supplemental Appendix 2. CBD Implementation Assessment Tool, *continued***

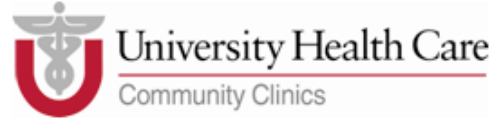

| Care Team (CT)                                                                                                                                      | Level 0 | Level 1 | Level 2                                              | Level 3 | Level 4                                                | Results | Score |  |
|-----------------------------------------------------------------------------------------------------------------------------------------------------|---------|---------|------------------------------------------------------|---------|--------------------------------------------------------|---------|-------|--|
| <b>CT17a:</b> documentation of patient communication needs                                                                                          | < 20%   | 20%-39% | 40%-59%                                              | 60%-79% | ≥80%                                                   |         |       |  |
| <b>CT17b:</b> presence of advance directives                                                                                                        | < 20%   | 20%-39% | 40%-59%                                              | 60%-79% | ≥80%                                                   |         |       |  |
| <b>CT17f:</b> PHQ-2 or PHQ-9 depression screen                                                                                                      | < 20%   | 20%-39% | 40%-59%                                              | 60%-79% | ≥80%                                                   |         |       |  |
| <b>CT20:</b> List of community resources for common needs                                                                                           | No list |         | List available, but < 5 external/community resources |         | List of commonly used community resources on ≥5 topics |         |       |  |
| <b>CT21:</b> Efficient communication among care team members (no wandering around looking for each other, white board items addressed within 3 min) | < 20%   | 20%-39% | 40%-59%                                              | 60%-79% | ≥80%                                                   |         |       |  |
|                                                                                                                                                     |         |         | <b><i>Subtotal (CT Average):</i></b>                 |         |                                                        |         |       |  |

Note: Italicized entries are not included in analyses reported.

**Supplemental Appendix 2. CBD Implementation Assessment Tool, *continued***

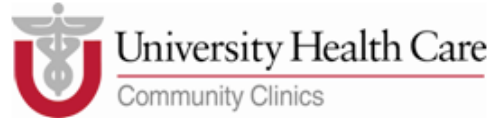

| Planned Care (PC)                                                                                                                  | Level 0                                                         | Level 1 | Level 2                                           | Level 3 | Level 4                                       | Results | Score |
|------------------------------------------------------------------------------------------------------------------------------------|-----------------------------------------------------------------|---------|---------------------------------------------------|---------|-----------------------------------------------|---------|-------|
| <b>PC1:</b> Use of registries for chronic care and preventive services                                                             | No registry or registry, but no evidence of review              |         | Registry with evidence of review, but no outreach |         | Registry with evidence of review and outreach |         |       |
| <b>PC2:</b> Labs done prior to the visit                                                                                           | < 20% of patients have completed $\geq 1$ labs before the visit | 20%-39% | 40%-59%                                           | 60%-79% | $\geq 80\%$                                   |         |       |
| <b>PC3:</b> Documentation that AVS was given to patient                                                                            | < 80% of patients given AVS                                     | 80%-89% | 90%-94%                                           | 95%-99% | 100%                                          |         |       |
| <b>PC5:</b> Medication reconciliation                                                                                              | Completed for < 80% of patients taking chronic medications      | 80%-89% | 90%-94%                                           | 95%-99% | 100%                                          |         |       |
| <b>PC7:</b> Procedure/consult notes available at time of visit (mammography, colonoscopy, endoscopy, cardiology)                   | < 20%                                                           | 20%-39% | 40%-59%                                           | 60%-79% | $\geq 80\%$                                   |         |       |
| <b>PC8:</b> Care plan documented for high-risk/important condition patients (set goals, identify barriers, action steps/referrals) | < 20%                                                           | 20%-39% | 40%-59%                                           | 60%-79% | $\geq 80\%$                                   |         |       |
| <b>PC9:</b> Track progress on care plan and action steps                                                                           | < 20%                                                           | 20%-39% | 40%-59%                                           | 60%-79% | $\geq 80\%$                                   |         |       |
| <b>PC10:</b> Contact patients postdischarge according to standard                                                                  | < 20%                                                           | 20%-39% | 40%-59%                                           | 60%-79% | $\geq 80\%$                                   |         |       |

**Supplemental Appendix 2. CBD Implementation Assessment Tool, *continued***

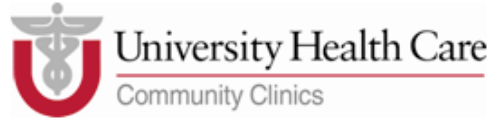

|                                                      |  |  |                                                          |  |
|------------------------------------------------------|--|--|----------------------------------------------------------|--|
|                                                      |  |  | <i>Subtotal (PC Average):</i>                            |  |
|                                                      |  |  |                                                          |  |
|                                                      |  |  | <i>Total Score (Average of Subtotal Section Scores):</i> |  |
| Note: Italicized items are not included in analyses. |  |  |                                                          |  |

**Supplemental Appendix 2. CBD Implementation Assessment Tool, *continued***

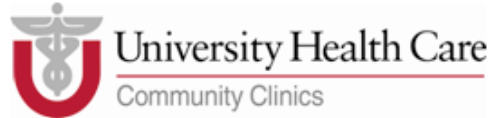

**Care by Design™ - Status of Implementation**

Revised 7/14/11

**Center:**

**Provider:**

**Observer:**

**Date:**

**Observation Summary Sheet**

**Clinic Observation**

|             |                                                                                                                                  |  |  |        |                    |           |            |
|-------------|----------------------------------------------------------------------------------------------------------------------------------|--|--|--------|--------------------|-----------|------------|
| <b>CT4:</b> | Standard Exam Rooms                                                                                                              |  |  |        |                    |           |            |
|             |                                                                                                                                  |  |  |        | Plan (circle one): | Yes       | No         |
|             |                                                                                                                                  |  |  |        |                    | <b>No</b> | <b>Yes</b> |
|             | <i>Total the number of "yes" results for each room and divide by the number of rooms observed to get the percent compliance.</i> |  |  | Exam 1 |                    |           |            |
|             |                                                                                                                                  |  |  | Exam 2 |                    |           |            |
|             |                                                                                                                                  |  |  | Exam 3 |                    |           |            |
|             |                                                                                                                                  |  |  | Exam 4 |                    |           |            |
|             |                                                                                                                                  |  |  | Exam 5 |                    |           |            |
|             |                                                                                                                                  |  |  | Exam 6 |                    |           |            |
|             |                                                                                                                                  |  |  |        | Percent compliance |           |            |

**Team Observation**

|              |                                           |  |                |                |                |                |                |
|--------------|-------------------------------------------|--|----------------|----------------|----------------|----------------|----------------|
|              |                                           |  |                |                |                |                |                |
|              |                                           |  | <b>Level 0</b> | <b>Level 1</b> | <b>Level 2</b> | <b>Level 3</b> | <b>Level 4</b> |
| <b>CT9:</b>  | Huddle and schedule review                |  |                |                |                |                |                |
| <b>CT11:</b> | Labs drawn in room                        |  |                |                |                |                |                |
| <b>CT13:</b> | MA engagement in the visit                |  |                |                |                |                |                |
| <b>CT20:</b> | List of commonly used community resources |  |                |                |                |                |                |
| <b>PC1:</b>  | Use of registry                           |  |                |                |                |                |                |



**Supplemental Appendix 2. CBD Implementation Assessment Tool, *continued***

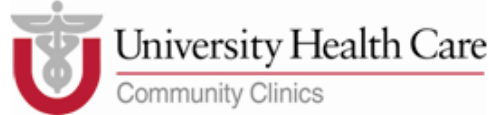

**Visit Observation**

*Score each item as follows: Yes = 1, No = 0*

*Use the definitions outlined in the Observation Criteria worksheet to score the item. Total the number of points for each item and divide by 5 to calculate results.*

|              |                                                                                                            | Patient 1 | Patient 2 | Patient 3 | Patient 4 | Patient 5 | Results |
|--------------|------------------------------------------------------------------------------------------------------------|-----------|-----------|-----------|-----------|-----------|---------|
| <b>CT7b:</b> | Did the patient experience efficient visit from rooming to exiting exam room? (waits ≤10 min during visit) |           |           |           |           |           |         |
| <b>CT12:</b> | Continuity of MA with patient throughout the visit                                                         |           |           |           |           |           |         |
| <b>CT21:</b> | Efficient communication among team members                                                                 |           |           |           |           |           |         |

**Team Observation Criteria**

| Element                                                                                                                                                                                                                 | No (0)                                                                                                                                                 | Yes (1)                                                                                                                                          |
|-------------------------------------------------------------------------------------------------------------------------------------------------------------------------------------------------------------------------|--------------------------------------------------------------------------------------------------------------------------------------------------------|--------------------------------------------------------------------------------------------------------------------------------------------------|
| <p><b>CT4: Standardized stocking of exam rooms:</b> Look at all exam rooms used by provider</p> <p><i>Definitions:</i><br/> <u>Presence of plan:</u> yes or no (can be posted in each room, or in central location)</p> | <p>Room not stocked according to plan (≥2 variances)</p> <p>or</p> <p>IF NO PLAN, room is stocked differently (≥2 variances) from other exam rooms</p> | <p>Room stocked according to plan (0-1 variances)</p> <p>or</p> <p>IF NO PLAN, room is stocked consistently (0-1 variances) with other rooms</p> |

**Supplemental Appendix 2. CBD Implementation Assessment Tool, *continued***

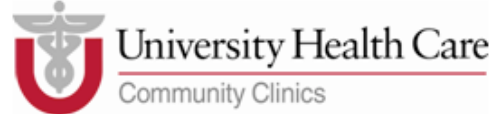

| Element                                                                                                                                                                                                                                                                                                                                                                                                                                                                                                                                                                       | Level 0                                      | Level 1                                             | Level 2                                                                                                              | Level 3                                              | Level 4                                                                                                                                                 |
|-------------------------------------------------------------------------------------------------------------------------------------------------------------------------------------------------------------------------------------------------------------------------------------------------------------------------------------------------------------------------------------------------------------------------------------------------------------------------------------------------------------------------------------------------------------------------------|----------------------------------------------|-----------------------------------------------------|----------------------------------------------------------------------------------------------------------------------|------------------------------------------------------|---------------------------------------------------------------------------------------------------------------------------------------------------------|
| <p><b>CT9: Huddles and schedule reviews:</b> ask provider and give brief description on back of Observation Summary Sheet</p> <p><i>Definitions:</i></p> <p><u>Administrative planning:</u> provider and MAs meet to review/discuss team schedules for the day, double-books, support function assignments (front desk, walk-in labs, etc). This can be a larger group of providers and teams of MAs</p> <p><u>Clinical planning:</u> provider and MAs review the patient schedule for the day and identify any reports, labs, etc. needed prior to/during patient visit.</p> | No daily administrative OR clinical planning | Administrative OR clinical planning 1-2 days a week | Administrative OR clinical planning ≥3 days a week<br><br>or<br>Administrative AND clinical planning 1-2 days a week | Administrative AND clinical planning 3-4 days a week | Administrative AND clinical planning 5 days a week<br><br>or<br>Administrative AND clinical planning every day provider is in clinic if < 5 days a week |
| <p><b>CT11: Lab draws done in room:</b> ask MA</p>                                                                                                                                                                                                                                                                                                                                                                                                                                                                                                                            | Labs drawn at lab or mini-lab                |                                                     |                                                                                                                      |                                                      | Labs drawn in room                                                                                                                                      |
| <p><b>CT13: MA engagement in the visit (required elements: uses X-files, addresses BPAs, documents physical exam, places orders, gives AVS to patient, makes follow-up appointment):</b> record elements used for each visit on back of Observation Summary Sheet</p>                                                                                                                                                                                                                                                                                                         | None                                         | 1-2 elements                                        | 3-4 elements                                                                                                         | 5 elements                                           | 6 elements                                                                                                                                              |

**Supplemental Appendix 2. CBD Implementation Assessment Tool, *continued***

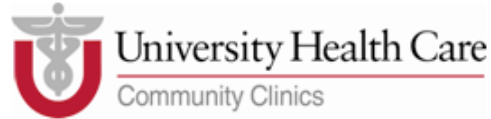

| Element                                                                                                                                                                                                                                                                                                                                                                                                                                                                                       | Level 0        | Level 1 | Level 2                                                                     | Level 3 | Level 4                                                                        |
|-----------------------------------------------------------------------------------------------------------------------------------------------------------------------------------------------------------------------------------------------------------------------------------------------------------------------------------------------------------------------------------------------------------------------------------------------------------------------------------------------|----------------|---------|-----------------------------------------------------------------------------|---------|--------------------------------------------------------------------------------|
| <p><b>CT20: List of commonly used community resources:</b><br/>ask MA to see list, record <math>\geq 5</math> resources on the back of the Observation Summary Sheet</p> <p><i>Definitions:</i><br/><u>Community resource</u><br/><i>examples:</i> smoking cessation, weight management, exercise/physical activity, nutrition, parenting, transportation for medical appointments, meal support, hospice, respite care, immunization information, breast feeding, child development, etc</p> | <p>No list</p> |         | <p>List available, but <math>&lt; 5</math> external/community resources</p> |         | <p>List of commonly used community resources on <math>\geq 5</math> topics</p> |

**Supplemental Appendix 2. CBD Implementation Assessment Tool, *continued***

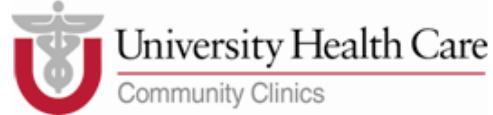

|                                                                                                                                                                                                                                                                                                                               |                                                           |                                            |                                                                                     |                                            |                                                                                  |
|-------------------------------------------------------------------------------------------------------------------------------------------------------------------------------------------------------------------------------------------------------------------------------------------------------------------------------|-----------------------------------------------------------|--------------------------------------------|-------------------------------------------------------------------------------------|--------------------------------------------|----------------------------------------------------------------------------------|
| <p><b>PC1: Use of registries for chronic care and preventive services:</b> ask Nursing Supervisor</p> <p><u>Definitions:</u><br/><u>Review:</u> notes on date of last visit, lab values, tests needed/ordered, etc</p> <p><u>Outreach:</u><br/>dates of phone calls or letters sent to patient about items due or overdue</p> | <p>No registry, or registry but no evidence of review</p> | <p style="background-color: #cccccc;"></p> | <p>Registry with evidence of review past 2 months (since 5/15), but no outreach</p> | <p style="background-color: #cccccc;"></p> | <p>Registry with evidence of review and outreach in past months (since 5/15)</p> |
|-------------------------------------------------------------------------------------------------------------------------------------------------------------------------------------------------------------------------------------------------------------------------------------------------------------------------------|-----------------------------------------------------------|--------------------------------------------|-------------------------------------------------------------------------------------|--------------------------------------------|----------------------------------------------------------------------------------|

**Supplemental Appendix 2. CBD Implementation Assessment Tool, *continued***

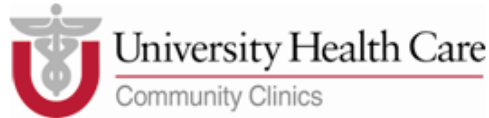

**Patient Observation Criteria**

*Select the first 5 adult (≥18 years) patients on the schedule after you arrive. If there are no shows/late cancellations, select the next patient until you reach 5.*

| Element                                                                                                                                                                                                                                                                                                                                                                                                                                                                                                        | No (0)                                                                                             |  | Yes (1)                                                                                   |
|----------------------------------------------------------------------------------------------------------------------------------------------------------------------------------------------------------------------------------------------------------------------------------------------------------------------------------------------------------------------------------------------------------------------------------------------------------------------------------------------------------------|----------------------------------------------------------------------------------------------------|--|-------------------------------------------------------------------------------------------|
| <p><b>CT7b: Efficient Visit: the patient does not wait during the visit</b><br/>                     Use Visit Documentation Worksheet to document 5 patients and record results on Observation Summary Sheet.<br/> <i>Definitions:</i><br/> <u>Waiting time:</u> non-value-added time for patient waiting after MA leaves room until provider arrives, waiting while provider leaves to get equipment or take a phone call, waiting while MA tracks down reports, draws immunizations, processes lab, etc</p> | <p>Patient waits <b>more than</b> 10 minutes from rooming to exiting exam room at end of visit</p> |  | <p>Patient waits 10 minutes or less from rooming to exiting exam room at end of visit</p> |
| <p><b>CT12: Continuity of MA with patient throughout the visit</b></p>                                                                                                                                                                                                                                                                                                                                                                                                                                         | <p>Different MAs support the patient's visit from rooming to departure</p>                         |  | <p>Same MA supports the patient's visit from rooming to departure</p>                     |

**Supplemental Appendix 2. CBD Implementation Assessment Tool, *continued***



|                                                                                                                                                                                                                                                                                                                                                                                                                                                                                      |                                                                      |  |                                                                                 |
|--------------------------------------------------------------------------------------------------------------------------------------------------------------------------------------------------------------------------------------------------------------------------------------------------------------------------------------------------------------------------------------------------------------------------------------------------------------------------------------|----------------------------------------------------------------------|--|---------------------------------------------------------------------------------|
| <p><b>CT21: Efficient communication among team members:</b> describe communication tools/processes used by team for each visit on back of Observation Summary Sheet</p> <p><i>Definitions:</i></p> <p><u>Immediately available:</u> MA and provider are in the room together at all times; or use Vocera/radios to contact each other, or can step out of exam room and see the other at nursing station/provider lounge; white boards if used are responded to within 1 minute.</p> | <p>Provider OR MA is not immediately available for communication</p> |  | <p>Provider AND MA are immediately available to communicate with each other</p> |
|--------------------------------------------------------------------------------------------------------------------------------------------------------------------------------------------------------------------------------------------------------------------------------------------------------------------------------------------------------------------------------------------------------------------------------------------------------------------------------------|----------------------------------------------------------------------|--|---------------------------------------------------------------------------------|

**Supplemental Appendix 2. CBD Implementation Assessment Tool, *continued***

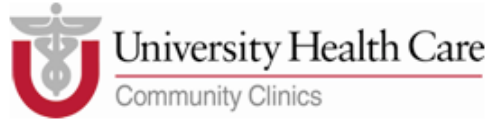

**Visit Documentation Worksheet - revised 7/14/11**

**CT7b: Visit Wait Time**

| Patient | Time MA starts rooming | Start of Wait Time 1 | End of Wait Time 1 | Start of Wait Time 2 | End of Wait Time 2 | Start of Wait Time 3 | End of Wait Time 3 | Start of Wait Time 4 | End of Wait Time 4 | Patient Exits Exam Room | Total Wait Time | Total Visit Time |
|---------|------------------------|----------------------|--------------------|----------------------|--------------------|----------------------|--------------------|----------------------|--------------------|-------------------------|-----------------|------------------|
| 1       |                        |                      |                    |                      |                    |                      |                    |                      |                    |                         |                 |                  |
| 2       |                        |                      |                    |                      |                    |                      |                    |                      |                    |                         |                 |                  |
| 3       |                        |                      |                    |                      |                    |                      |                    |                      |                    |                         |                 |                  |
| 4       |                        |                      |                    |                      |                    |                      |                    |                      |                    |                         |                 |                  |
| 5       |                        |                      |                    |                      |                    |                      |                    |                      |                    |                         |                 |                  |

**Comments:**

| Supplemental Appendix 2. CBD Implementation Assessment Tool, <i>continued</i>                                                                    |                                                                       |  |  |  |  |
|--------------------------------------------------------------------------------------------------------------------------------------------------|-----------------------------------------------------------------------|--|--|--|--|
|                                                                |                                                                       |  |  |  |  |
| Comments                                                                                                                                         |                                                                       |  |  |  |  |
| CT4: Exam room stocking                                                                                                                          |                                                                       |  |  |  |  |
| CT9: Description of administrative and clinical planning                                                                                         |                                                                       |  |  |  |  |
| CT11: Lab draws                                                                                                                                  |                                                                       |  |  |  |  |
| CT13: Elements MA used during the visit                                                                                                          |                                                                       |  |  |  |  |
| CT 20: List ≥5 community resources that you saw on the resource list                                                                             |                                                                       |  |  |  |  |
| PC1: Registry                                                                                                                                    |                                                                       |  |  |  |  |
|                                                                                                                                                  | Patient 1      Patient 2      Patient 3      Patient 4      Patient 5 |  |  |  |  |
| CT12: Continuity of MA                                                                                                                           |                                                                       |  |  |  |  |
| CT21: Describe communication processes and tools used by the team during the visit                                                               |                                                                       |  |  |  |  |
| AVS = After-Visit Summary; BPA = Best Practice Alert; MA = medical assistant; PHQ = Patient Health Questionnaire; TSF = telephone service facto. |                                                                       |  |  |  |  |
